# Supplementary material for: EGR2 is a hub-gene in myocardial infarction and aggravates inflammation and apoptosis in hypoxia-induced cardiomyocytes
Source: PubMed Central journal article supplement (PMC9377070; doi:10.1186/s12872-022-02814-3), 2022-08-15

# Uncropped gels for Western blots

4B

Normoxia Hypoxia

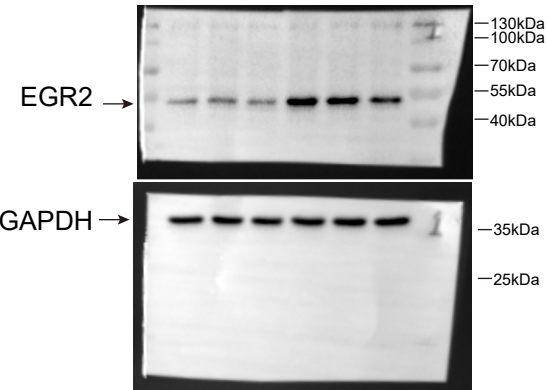

4C

Flag Flag-EGR2

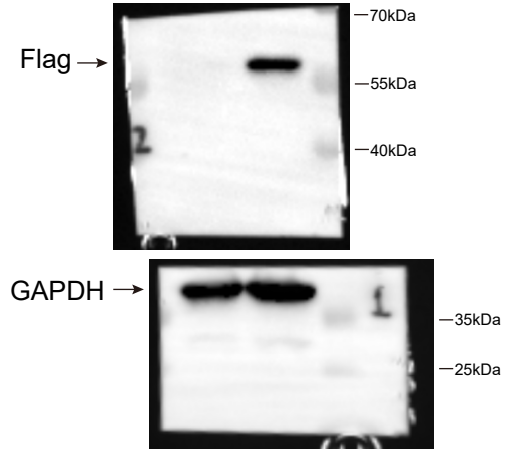

5A

WT KO

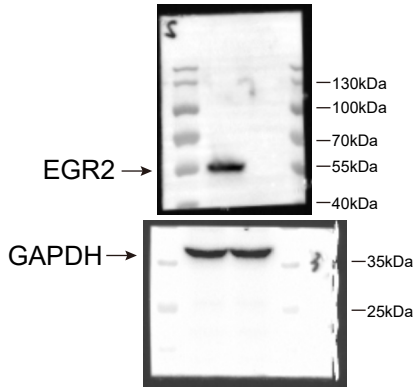

5D

Hypoxia

WT KO

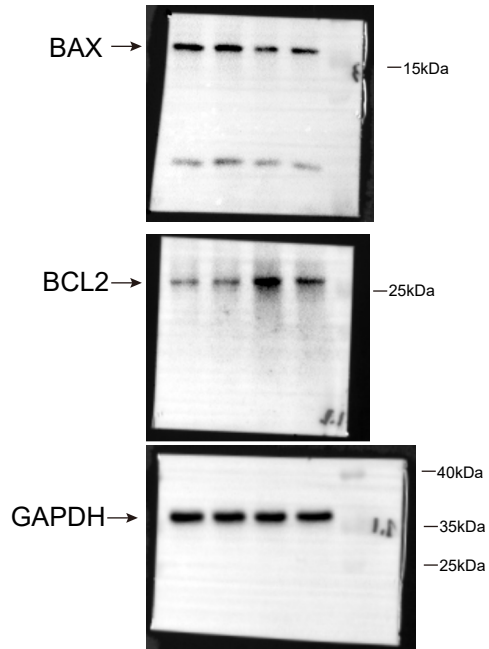

Supplement: 12872_2022_2814_MOESM1_ESM.pdf [file 12872_2022_2814_MOESM1_ESM.pdf]
